# Supplementary material for: High‐Affinity Anti‐VISTA Antibody Protects against Sepsis by Inhibition of T Lymphocyte Apoptosis and Suppression of the Inflammatory Response
Source: Hindawi journal article supplement (doi:10.1155/2021/6650329), 2021-01-01

**A**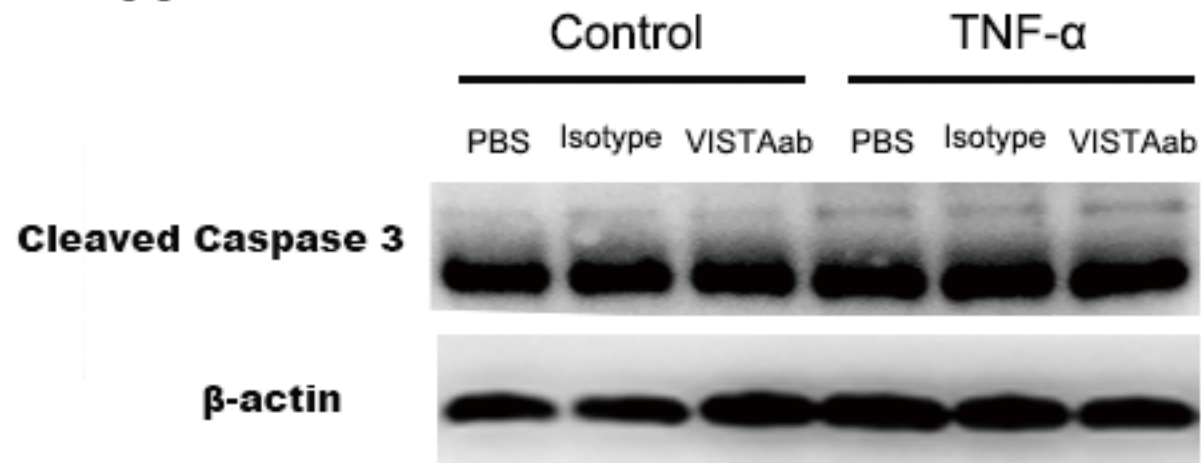**B**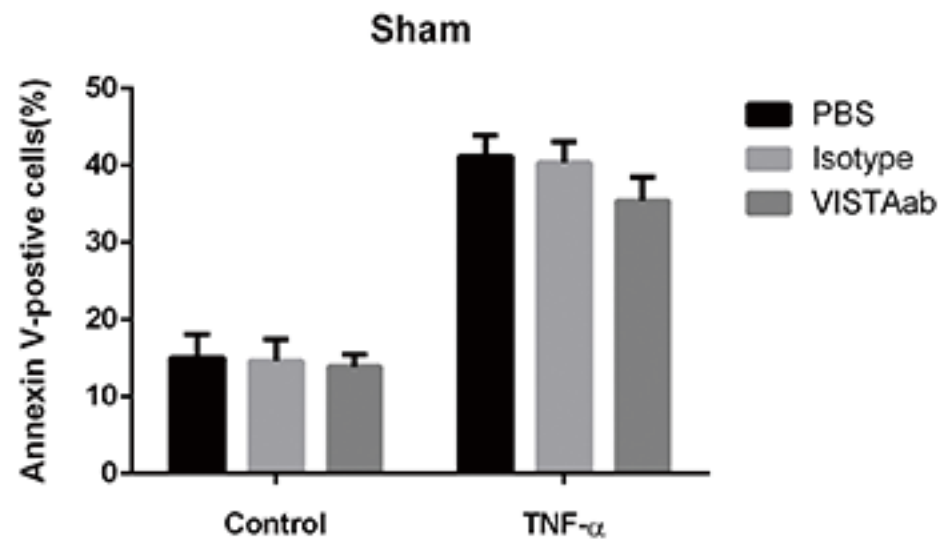

Supplement: f2 [file 6650329.f2.pdf]
